# 1 **Calorie restriction intervention induces enterotype-associated** 2 **BMI loss in nonobese individuals**

3 Hua Zou<sup>1,2, 6\*</sup>, Dan Wang<sup>2, 6\*</sup>, Huahui Ren<sup>2,3,5\*</sup>, Peishan Chen<sup>2,3</sup>, Chao Fang<sup>2,3,5</sup>, Zhun  
4 Shi<sup>2,3</sup>, Pengfan Zhang<sup>1,2</sup>, Jian Wang<sup>2,4</sup>, Huanming Yang<sup>2,4</sup>, Kaiye Cai<sup>2,3,6#</sup>, Huanzi Zhong  
5 2,3,5 #

6 <sup>1</sup> BGI Education Center, University of Chinese Academy of Sciences, Shenzhen 518083,  
7 China

8 <sup>2</sup> BGI-Shenzhen, Shenzhen 518083, China

9 <sup>3</sup> China National Genebank, BGI-Shenzhen, Shenzhen 518120, China

10 <sup>4</sup> James D. Watson Institute of Genome Sciences, Hangzhou 310058, China

11 <sup>5</sup> Laboratory of Genomics and Molecular Biomedicine, Department of Biology,  
12 University of Copenhagen, 2100 Copenhagen Ø, Denmark

13 <sup>6</sup> Shenzhen Key Laboratory of Human commensal microorganisms and Health Research

14 \*These authors contributed equally to this work

15 #**Corresponding authors:**

16 Kaiye Cai. E-mail: [caikaiye@genomics.cn](mailto:caikaiye@genomics.cn);

17 Huanzi Zhong. E-mail: [zhonghuanzi@genomics.cn](mailto:zhonghuanzi@genomics.cn)

18

## 19 **Abstract**

20 Calorie restriction (CR), which has the potential effect to weight loss and blood amino  
21 acids, has been demonstrated to associate with gut microbiota in human, especially in  
22 obese individuals. However, studies for simultaneously evaluating enterotype-dependent  
23 impacts of CR on the gut microbiota and blood amino acids in nonobese individuals are  
24 still limited.

25 Here, 41 nonobese individuals received a 3-week CR diet with approximately 50% fewer  
26 calories than normal diet. We measured their BMI and blood amino acid concentration,  
27 along with the gut microbiota before and after the intervention. In this trial, 28 Enterotype  
28 *Bacteroides* (ETB) subjects and 13 Enterotype *Prevotella* (ETP) subjects were identified  
29 before the intervention. Short-term CR dietary intervention decreased the body mass  
30 index (BMI) in most subjects but varied in subjects with different enterotypes. ETP  
31 subjects exhibited significantly higher BMI loss ratio than the ETB subjects. CR  
32 additionally induced substantial enterotype-independent changes in blood amino acids,  
33 but only minor changes in gut microbial composition.

34 We further built a prediction model based on baseline relative abundances of 7 gut  
35 microbial species showing high performance in predicting CR-associated BMI loss ratio.  
36 Among them, the relative abundance of ETB-enriched *Clostridium bolteae* and *C.*  
37 *ramosum* were negatively correlated with BMI loss ratio while the relative abundance of  
38 *Dorea longicatena* which was slightly enriched in ETP subjects, was positively correlated  
39 with BMI loss ratio.

40 Together, our work points out that the individual variation of BMI loss after CR could be  
41 partially correlated with different microbial composition and highlights the potential  
42 application for microbiome stratification in personalized nutrition intervention.

43

#### 44 **Keywords**

45 Calorie restriction, gut microbiota, enterotype, amino acids, body mass index.

46

#### 47 **Introduction**

48 Calorie restriction, a nutritional intervention of reduced energy intake, has been  
49 demonstrated to reduce body weight and modulate serum metabolic in human population  
50 in many studies [1, 2]. Observational studies with long-term CR found that CR resulted in  
51 weight loss and decreasing chronic disease risk factors in nonobese persons [3-6]. For  
52 instance, in a 2-year nonobese human trial, CR significantly decreased body weight and

53 cardiometabolic risk factors, such as triglycerides and total cholesterol [4]. Another study  
54 [5] also provided evidence for reduced BMI and improved mood and sleep duration with  
55 CR in healthy nonobese adults. However, studies about potential negative impacts of CR  
56 on human health remain limited.

57 CR intervention affecting gut microbiota and blood amino acids has been explored in  
58 many studies, particularly among overweight and obese individuals [7-10]. A 4-week CR  
59 intervention improved gut barrier integrity, reduced systemic inflammation on gut  
60 microbial diversity and BMI loss in obese women, suggesting a potential association  
61 among gut microbiota, CR and BMI [8]. Increasing studies have demonstrated that the  
62 gut microbiota has been implicated in modulating host energy and nutrient metabolism  
63 [11] and regulating the production of gastrointestinal hormones and host appetite [12, 13].  
64 Enterotype, a concept for stratifying individuals based on the gut microbiota, was first  
65 described in 2011 and was closely linked to long-term dietary patterns [14, 15]. Plenty of  
66 studies have reported that individuals have shown microbial-dependent (enterotypes,  
67 *Bacteroides* to *Prevotella* ratio) metabolic responses to the same intervention, including  
68 changes of BMI and glycemic indices [12, 15-20]. As for the association between CR and  
69 blood amino acids, Biolo *et.al* reported changes in blood amino acids of 9 healthy  
70 nonobese men after 2-week CR diet [10]. Despite the plenty of studies on CR as we  
71 mentioned above, to our knowledge, there are no studies for simultaneously evaluating  
72 impacts of CR on BMI, gut microbiota and blood amino acids in nonobese individuals in  
73 a single study.

74 Here, we conducted a 3-week CR intervention on 41 nonobese subjects with two  
75 enterotypes, including enterotype *Bacteroides* (ETB) and enterotype *Prevotella* (ETP).  
76 We found that ETP subjects had higher BMI loss ratio than ETB subjects after CR  
77 intervention. On the other hand, we found that there were no obvious changes in the gut  
78 microbiota composition of two enterotype groups after the CR intervention and the two  
79 enterotype groups showed consistent changes in levels of multiple blood amino acids. We  
80 further demonstrated that baseline relative abundances of 7 gut microbial species  
81 including 3 enterotype-specific species (*C. boltea*, *C. ramosum*, and *D. longicatena*),  
82 rather than baseline BMI and blood amino acids levels, could well predict CR-associated

83 BMI loss ratio. Additionally, we found significantly increased levels of 3-methylhistidine  
84 after the intervention, a potential biomarker for muscle protein turnover, suggesting  
85 possible muscle protein loss under a CR diet with lower than normal protein availability.

86

## 87 **Materials and methods**

### 88 **Volunteer Recruitment**

89 Volunteer-wanted posters were propagated at the China National Gene Bank in Shenzhen  
90 from March to April 2017. A non-obese healthy volunteer was considered if his/her BMI  
91 was less than 28 kg/m<sup>2</sup> [21]. In addition, recruited volunteers should meet all the  
92 following criteria: 1) without antibiotics in the recent 2 months; 2) without prebiotic or  
93 probiotic supplements in the recent 2 months; 3) without hypertension, diabetes mellitus,  
94 gastrointestinal disease and other severe auto-immune disease; 4) regular eating and  
95 lifestyle patterns; 5) no international travel in the recent 3 month. 50 individuals met all  
96 the criteria and were recruited in this study, and 41 individuals (24 females and 17 males  
97 aged 30 ± 6 years old) completed the whole intervention (**Table 1**). The study was  
98 approved by the institutional review board on bioethics and biosafety of BGI-Shenzhen,  
99 Shenzhen (NO. BGI-IRB 17020). All participants were fully informed of the design and  
100 purpose of this intervention study and signed a written informed consent letter.

### 101 **Study design and low-calorie food preparation**

102 The study included a one-week run-in period (baseline) and a three-week CR dietary  
103 intervention period. During the first week (run-in period), all healthy volunteers  
104 consumed their usual diet and were encouraged to avoid yoghurt, high-fat foods and  
105 alcohol. The CR diet was comprised of ~50% calories of a normal-calorie diet (female,  
106 1000kcal/day; male, 1200kcal/day). It was designed with carbohydrate, fat and protein as  
107 approximately 55%, 30% and 15% of the total energy intake respectively, according to  
108 the Dietary Guidelines for Chinese Residents (2016) and nutritionally balanced [22] and a  
109 recent large nutritional study in China [23]. Common foods in low-calorie diets such as  
110 rice, vegetables, eggs, pork and beef were prepared in our study center to control  
111 experimental variables introduced by different foods and calorie estimation errors.

112 Traditional Chinese cooking style - boiled, stir-fried and stewed, were applied for our  
113 foods. For each meal, digital scales were used to measure the nutritional and caloric  
114 values of different foods and total meal for male and female respectively.

115 BMI, blood and fecal samples of each volunteer were collected at our study center at  
116 baseline and after the 3-week CR intervention (**Figure 1**). To avoid intra-individual  
117 variations, BMI was collected multiple times of each volunteer during the last week of  
118 the CR intervention, and the averaged BMI value was used as his/her after-intervention  
119 BMI (**Figure 1**).

### 120 **Fecal sampling and shotgun metagenomic sequencing**

121 Fecal samples were self-collected and then transferred to the laboratory on dry ice and  
122 kept frozen at -80°C before and after the CR intervention. Fecal DNA was extracted  
123 following a manual protocol as described previously [24]. The DNA concentration was  
124 estimated by Qubit (Invitrogen). Library construction and shotgun metagenomics  
125 sequencing were performed on qualified DNA samples based on the BGISEQ-500  
126 protocol in the single-end 100bp mode [25].

### 127 **Metagenomic analysis**

128 Raw reads of BGISEQ-500 with SE100 mode were trimmed by an overall accuracy (OA)  
129 control strategy to control quality [25]. After trimming, averagely, 98.15% of the raw  
130 reads still remained as high-quality reads (**Supplemental Table 1**). By using SOAP2.22  
131 software, the high-quality reads were aligned to hg19 to remove reads from host DNA  
132 (identity  $\geq 0.9$ ). The retained clean reads were aligned to the integrated non-redundant  
133 gene catalog (IGC) using SOAP2.22 [26] and the average mapping rate and unique  
134 mapping rate were 80.18% and 65.76% respectively (identity  $\geq 0.95$ , **Supplemental**  
135 **Table 1**). The relative abundance profiles of genes, genera, species and Kyoto  
136 Encyclopedia of Genes and Genomes orthologous groups (KEGG, KOs) of each sample  
137 were calculated by summing the relative abundances of their assigned IGC genes [26].

138 For enterotyping, we applied a recently published universal classifier  
139 (<http://enterotypes.org/>), which circumvents major shortcomings in enterotyping  
140 methodology such as lack of standard and small sample size [27].

141 At baseline, 41 individuals were clustered into two groups: 28 ETB (*Bacteroides*  
142 enriched) and 13 ETP (*Prevotella* enriched) individuals 87.8% (36 of 41) individuals  
143 were clustered to the same enterotype after the 3-week CR intervention. Detailed  
144 enterotype information for each individual is provided in **Supplemental Table 2**.

145 Genus or species with an occurrence rate > 80% and a median relative abundance > 1e-6  
146 in all samples were defined as common genus or species and used for further intra- and  
147 inter-enterotype comparison analyses **Supplemental Table 3-4**.

148 Differentially enriched KEGG pathways were identified between enterotypes and  
149 between different time points, based on the distribution of Z-scores of all KOs belonging  
150 to a given pathway [28, 29]. A reporter score  $|Z| > 1.96$  (95% confidence interval  
151 according to a normal distribution) was used as a detection threshold for significantly  
152 differentiating pathways.

153 Alpha diversity of each individual was calculated on the gene and species relative  
154 abundance profiles using the Shannon index. Beta-diversity on the gene and species  
155 relative abundance profiles was calculated using the Bray-Curtis distance.

### 156 **Blood sample collection and amino acids profiling**

157 Fasting blood samples were collected before and after the intervention for amino acids  
158 analysis. These blood samples were then centrifuged, and serum samples were collected  
159 and stored at -80 °C. The concentrations of 31 amino acids and derivatives in the serum  
160 samples were then measured via ultra-high pressure liquid chromatography (UHPLC)  
161 coupled to an AB Sciex Qtrap 5500 mass spectrometry (AB Sciex, US) as described  
162 previously [30].

### 163 **Statistical methods**

#### 164 **Pearson's chi-square test**

165 Pearson's chi-square test was performed to assess sex distribution between individuals of  
166 two enterotypes.

#### 167 **Wilcoxon rank-sum test & Wilcoxon Signed-rank test**

168 Wilcoxon rank-sum test was used to detect the significant differences on phenotypes, the  
169 concentrations of blood amino acids and the relative abundances of genera and species  
170 between enterotypes.

171 Wilcoxon signed-rank test was used to detect the significant differences on phenotypes,  
172 the concentrations of blood amino acids and the relative abundances of genera and  
173 species in paired samples before and after the intervention.

#### 174 **BMI loss ratio**

175 BMI loss ratio of a given individual was calculated using the following equation:

$$BMI\ loss\ ratio = \frac{Before_{BMI} - After_{BMI}}{Before_{BMI}} * 100\%$$

176 Where  $Before_{BMI}$  and  $After_{BMI}$  are the BMI value of the same individual before and  
177 after the CR intervention, respectively.

#### 178 **PERMANOVA**

179 The association between enterotypes and the overall blood amino acid profile at baseline  
180 was assessed using permutational multivariate analysis of variance (PERMANOVA) with  
181 9,999 permutations on enterotypes (R *vegan* package, *adonis* function, method="bray").

#### 182 **PCoA**

183 Principal coordinate analysis (PCoA) of fecal samples was performed based on the  
184 relative abundances of common species using Bray-Curtis distance (R *ape* package).

#### 185 **PCA**

186 Principal component analysis (PCA) was performed based on the blood amino acid  
187 profiles to visual overall amino acid composition between enterotypes, and that before  
188 and after the intervention.

#### 189 **Feature selection of gut species and serum amino acids**

190 To investigate whether we could predict BMI loss ratio using omics features, we  
191 performed a Lasso (Least absolute shrinkage and selection operator) regression analysis

192 between baseline relative abundances of gut common species and the concentrations of  
193 blood amino acids (independent variables), and BMI loss ratio (dependent variables).

194 We first normalized values of both independent and dependent variables (R, *scale*  
195 function). We then used the R function *cv.glmnet* to choose the most appropriate value  
196 for  $\lambda$  in the Lasso model (R *glmnet* package,  $\alpha = 1$ , family="gaussian",  $\text{nfolds} = 10$ ,  
197  $\alpha = 1$ ,  $\text{nlambda} = 100$ ). Here,  $\lambda$  is the tuning parameter ( $\lambda \geq 0$ ) which controls the  
198 strength of the shrinkage of the variables [31]. We then applied the Lasso feature  
199 selection process by shrinking the Lasso regression coefficients of non-informative  
200 variables to zero and selecting the variables of non-zero coefficients. Seven gut microbial  
201 species including *Clostridium bolteae*, *Clostridium ramosum*, *Dorea longicatena*,  
202 *Coprococcus eutactus*, *Streptococcus mitis*, *Clostridiales genomosp. BVAB3* and  
203 *Mobiluncus curtisii* were selected at this step.

#### 204 **Performance estimation of BMI loss ratio prediction model**

205 To reduce overfitting with a limited sample size ( $n = 41$ ), we applied leave-one-out cross  
206 validation (LOOCV) to estimate the prediction performance of BMI loss ratio using a  
207 generalized linear model (GLM) of the seven selected features (*creatFolds* function in R  
208 *caret* package and the *glm* function in R *base* package). Likewise, we also used baseline  
209 BMI values for LOOCV to estimate its prediction performance for CR-associated BMI  
210 loss ratio. Spearman's rho values were calculated between actual BMI loss ratios and the  
211 predicted values.

#### 212 **Significance cutoff**

213 P-value adjustment was applied for multiple hypothesis testing on the concentrations of  
214 blood amino acids, the relative abundances of gut microbial genera and species used  
215 Benjamini-Hochberg (BH) method. BH-adjusted P value less than 0.05 was considered  
216 as statistical significance. The significance for  $\alpha$ -diversity,  $\beta$ -diversity and phenotypes  
217 (age, female to male ratio, BMI and BMI loss ratio) was set at  $p < 0.05$ .

218 All statistical analyses were conducted using R (version 3.5.0).

219



## 220 **Result**

### 221 **BMI loss of ETB and ETP subjects responded differentially to CR Intervention**

222 Based on the baseline genera abundance profile, individuals can be robustly clustered  
223 into two enterotypes: enterotype *Bacteroides* (ETB, n = 28) and enterotype *Prevotella*  
224 (ETP, n = 13) (See Materials and Methods, **Figure 2A**).

225 Comparisons of the baseline phenotypes between two enterotype groups revealed that all  
226 collected phenotypes, including sex distribution (female/male ratio), age, BMI and  
227 weight, showed no significant differences between ETB and ETP subjects (**Table 2**,  
228 **Figure 2B**). By contrast, the baseline compositional and functional characteristics of the  
229 gut microbiota showed marked differences between two groups, in agreement with the  
230 previous studies [12, 15, 32]. For instance, genera *Prevotella* and *Paraprevotella* and four  
231 species from the two genera were significantly enriched in ETP subjects whereas 19  
232 common species, from such as genera *Bacteroides* and *Clostridium* including *C. bolteae*  
233 and *C. ramosum*, were significantly enriched in ETB subjects (Wilcoxon rank-sum test,  
234 BH-adjusted  $P < 0.05$ ; **Supplemental Figure 1A**, **Supplemental Table 5-6**). At the  
235 functional level, multiple pathways in carbohydrate metabolism and membrane transport  
236 were highly enriched in ETB subjects whereas four pathways including biosynthesis of  
237 phenylalanine, tyrosine and tryptophan (map00400), peptidoglycan (map00550),  
238 terpenoid backbone (map00900); and methane metabolism (map00680) were enriched in  
239 ETP subjects ( $|Z\text{-score}| > 1.96$ , **Supplemental Figure 1B**, **Supplemental Table 7**).

240 After the 3-week CR intervention, BMI values were decreased significantly in both ETB  
241 and ETP subjects (**Figure 2C**; Wilcoxon Signed-rank test,  $p < 0.05$ ). Interestingly,  
242 subsequent analysis revealed that ETP subjects showed significantly greater BMI loss  
243 ratio than ETB subjects (Wilcoxon rank-sum test,  $p < 0.05$ ; mean BMI loss ratio 3.27%  
244 versus 1.84%; **Figure 2D**; see Materials and Methods).

### 245 **Overall gut microbiome composition is stable to CR Intervention**

246 We next investigated the extent and impacts of the CR intervention on gut microbial  
247 composition in subjects of different enterotypes. Principal coordinate analysis (PCoA)  
248 based on species abundance profile of all samples showed that the projected coordinates

249 of each enterotype group did not change significantly before and after the intervention  
250 (**Figure 3A**,  $p > 0.05$ ). Furthermore, 23 of 28 ETB subjects and 12 of 13 ETP subjects  
251 were assigned to the same enterotypes after the intervention (**Supplemental Table 2**). In  
252 addition,  $\alpha$ -diversity (**Figure 3B-C**) and  $\beta$ -diversity (**Figure 3D-E**) at the genera and  
253 species level of fecal samples also showed no significant changes before and after the  
254 intervention in two enterotype groups, respectively (Wilcoxon Signed-rank test,  $P >$   
255  $0.05$ ). We further revealed that no common species differed significantly in abundance  
256 before and after the intervention in each enterotype group (**Supplemental Table 8**, BH-  
257 adjusted  $P > 0.05$ ). All these findings suggest overall stable gut microbial composition in  
258 response to a 3-week 50% energy deficit CR intervention.

259 On the other hand, we observed that the abundances of several functional pathways were  
260 changed after the intervention. For instance, abundances of pathways for pentose and  
261 glucuronate interconversions (map00040) and galactose metabolism (map00052) were  
262 significantly decreased after the CR intervention in both enterotype groups. ETB  
263 individuals additionally exhibited significantly reduced levels of pathways involved in  
264 cofactors metabolism (pantothenate and CoA biosynthesis, map00770; biotin metabolism,  
265 map00780) and increased levels of pathways for amino acids metabolism (phenylalanine  
266 metabolism, map00360; cysteine and methionine metabolism, map00270) after the  
267 intervention (**Supplemental Table 9**).

### 268 **Enterotype-independent alterations of blood amino acids to CR Intervention**

269 Reflecting differential gut microbial functional potentials including amino acid  
270 metabolism between two enterotype groups, we asked whether blood amino acid  
271 composition was associated with enterotype. PCA of baseline amino acid profiles showed  
272 no separation of subjects of two enterotypes (**Figure 4A**, PERMANOVA,  $p > 0.05$ , See  
273 Material and Methods). In line with this result, we found no significant differences of  
274 baseline levels of blood amino acids between two enterotype groups (Wilcoxon rank-sum  
275 test, BH-adjusted  $P > 0.05$ , **Figure 4B**, **Supplemental Table 10**).

276 We next examined the potential impacts of the CR diet on blood amino acids. Notably,  
277 we observed similar changes in multiple blood amino acid concentrations in subjects of

278 both enterotypes in response to the CR intervention (**Figure 4C, Supplemental Table**  
279 **11**). We therefore combined all samples and found that levels of 13 blood amino acids or  
280 amino acid derivatives such as  $\alpha$ -aminoisobutyric acid,  $\beta$ -alanine, glycine, serine, lysine  
281 and its degradation product 2-aminoadipic acid, and 3-methyl-histidine were significantly  
282 increased whereas only one measured amino acid tyrosine was significantly decreased  
283 after the intervention (Wilcoxon Signed-rank test, BH-adjusted  $P < 0.05$ , **Figure 4D**). In  
284 addition, we observed no significant differences in levels of blood amino acids between  
285 ETB and ETP subjects after the CR intervention (Wilcoxon rank-sum test, BH-adjusted  
286  $P > 0.05$ , **Supplemental Table 12**), suggesting the effects of the CR intervention on  
287 blood amino acids were enterotype independent.

### 288 **Prediction of BMI loss ratio induced by CR intervention using gut microbial species**

289 Considering the differential response in the BMI loss ratio to the CR intervention in two  
290 enterotypes, we next asked whether we could predict BMI loss ratio from the baseline  
291 omics measures. We thus built a Lasso shrinkage model between baseline levels of gut  
292 microbial species and blood amino acids and BMI loss ratio (**See Materials and**  
293 **Methods**). We successfully selected 7 gut microbial species showing associations with  
294 BMI loss ratio (Coefficient estimate  $> 0$ , **Figure 5A**). Interestingly, the relative  
295 abundances of 2 selected species *C. boltea* and *C. ramosum*, which were enriched in  
296 ETB (Wilcoxon rank-sum test, BH-adjusted  $P < 0.05$ , **Supplemental Figure 1A,**  
297 **Supplemental Table 8**), were negatively correlated with BMI loss ratio. On the other  
298 hand, the relative abundance of *D. longicatena* which was slightly enriched in ETP  
299 (Wilcoxon rank-sum test, BH-adjusted  $P = 0.06$ ) was positively correlated with BMI loss  
300 ratio (**Figure 5A**). Baseline abundances of the other 4 Lasso selected species, however,  
301 showed no significant differences between two enterotype groups (BH-adjusted  $P > 0.05$ ,  
302 **Supplemental Table 6**). Among them, the abundances of *Coprococcus eutactus*,  
303 *Streptococcus mitis* and *Clostridiales genomosp. BVAB3* were positively associated with  
304 BMI loss ratio whereas the abundance of *Mobiluncus curtisii* was negatively associated  
305 with BMI loss ratio (**Figure 5A**).

306 To estimate the performance of 7 gut microbial species on the prediction of BMI loss  
307 ratio, we applied a general linear model between predicted BMI loss ratios and true

308 values using leave-one-out cross validation (LOOCV). Notably, the result showed the  
309 predicted BMI loss ratio was significantly correlated with the true BMI loss ratio with a  
310 Spearman's rho of 0.646 (**Figure 5B**, See Materials and Methods). By contrast, we  
311 found that the individual baseline BMI could hardly predict their BMI loss after the CR  
312 intervention (Spearman's rho = -0.016, **Supplemental Figure2**).

313

## 314 **Discussion**

315 Here we evaluated changes in BMI, blood amino acids and the gut microbiota of 41  
316 nonobese subjects stratified by enterotype after a 3-week 50% energy deficit CR  
317 intervention. We revealed that CR had significant effects on BMI and ETP subjects had  
318 higher BMI loss ratio than ETB subjects. Additionally, CR showed only minor impacts  
319 on gut microbial composition but significantly impacted blood amino acids in an  
320 enterotype-independent manner. We further selected 7 gut bacterial species whose  
321 baseline relative abundances could well predict BMI loss ratio induced by the CR  
322 intervention.

323 In this study, nonobese ETP individuals showed greater BMI loss than ETB individuals  
324 after our 3-week intervention. Similar findings were also reported in overweight  
325 individuals that high *Prevotella/Bacteroides* ratio group had higher weight loss than low  
326 *Prevotella/Bacteroides* ratio group when receiving the New Nordic Diet [17] and a 500  
327 kcal/day energy deficit diet [9]. Importantly, we successfully constructed a BMI loss ratio  
328 prediction model based on baseline relative abundance of 7 gut microbial species. Among  
329 them, *C. ramosum* and *C. boltea* (negatively associated with BMI loss ratio in our model)  
330 were significantly more enriched in ETB subjects while *D. longicatena* (positively  
331 associated with BMI loss ratio in our model) was slightly more enriched in ETP subjects.  
332 These three enterotype-specific species in our prediction model also have been reported  
333 by several other studies. A previous study showed that *C. ramosum* could enhance high-  
334 fat-diet-induced obesity in gnotobiotic mice, probably by enhancing nutrient absorption  
335 [33]. Two human studies have also reported a positive link between the abundance of *C.*  
336 *ramosum* and several obese-related metabolic parameters [34, 35]. In an obese

337 postmenopausal women study, the fecal abundance of *C. bolteae* was positively  
338 correlated with multiple metabolic markers such as fasting glucose and insulin resistance,  
339 whereas *D. longicatena* was negatively correlated [36].

340 Combining the results of our prediction model and all the above-mentioned studies, the  
341 different enrichment of *C. ramosum*, *C. bolteae* and *D. longicatena* between ETB and  
342 ETP subjects may help explain why ETP subjects showed significantly larger BMI loss  
343 ratio than ETB subjects. Moreover, all selected 7 species annotated to genera  
344 *Coprococcus*, *Streptococcus*, *Clostridium*, *Dorea* and *Mobiluncus* were not the main  
345 contributors to enterotypes, suggesting the need for human gut microbial stratification in  
346 a higher resolution than enterotypes in further microbiome-based personalized  
347 intervention studies.

348 Attention should also be paid that levels of multiple amino acids and their derivatives  
349 were significantly increased in healthy non-obese subjects after the CR intervention,  
350 including 3-methylhistidine, a well-established biomarker of skeletal muscle protein  
351 turnover [37, 38]. Previous studies have reported that skeletal muscle acted as a fuel  
352 reserve to provide glucose disposal for other organs during fasting in human [38, 39].  
353 Since the CR in our study was 50% of normal energy-intake and contained much lower  
354 protein than a normal diet, it can be speculated that skeletal muscle proteins might be  
355 partially broken down for supplying energy. By contrast, another previous study which  
356 provided a high-soy-protein diet induced weight loss without losing muscle mass in obese  
357 and pre-obese subjects [40]. All these findings suggest that the availability of adequate  
358 dietary proteins in further diet interventions is important to preserve healthy muscle mass  
359 during weight loss.

360

## 361 **Acknowledgements**

362 We are very grateful to acknowledge colleagues from the China National Genebank for  
363 preparing calorie restriction diets, and for DNA extraction, library construction and  
364 sequencing.

365

## 366 **Contributions**

367 Z.H.Z and K.Y.C designed the project. P.S.C and K.Y.C oversaw the collection of fecal  
368 and blood samples and phenotypic data. H.Z, D.W, H.H.R and Z.H.Z established the  
369 concept and analysis framework of the study. H.Z, H.H.R and D.W performed the  
370 bioinformatic analysis. H.Z wrote the first version of the manuscript. D.W and Z.H.Z  
371 substantially revised the manuscript. All authors contributed to and approved the final  
372 manuscript.

373

## 374 **Funding source and disclosure of conflicts of interests**

375 The authors declare that they have no competing interests. This work was funded by  
376 National Key Research and Development Program of China (No.2017YFC0909703) and  
377 support of Shenzhen Municipal Government of China (No. CXB201108250098A).

378

## 379 **Ethics approval and consent to participate**

380 The study protocol was approved by the institutional review board on bioethics and  
381 biosafety of BGI-Shenzhen, Shenzhen (NO. BGI-IRB 17020). Written informed  
382 consent was obtained from all participants before the CR intervention.

383

## 384 **Availability of data and material**

385 The metagenomic sequencing data of this study have been deposited in the China  
386 National Genebank Nucleotide Sequence Archive (CNSA) (<https://db.cngb.org/cnsa/>)  
387 under the BioProject number CNP0000247. The scripts and gut microbial profiles used to  
388 perform statistical analysis and figure plotting are available at  
389 <https://github.com/HuaZou/NonobeseBP>.

390

391 **Reference**

392

- 393 1. Zheng X, Wang S, Jia W: **Calorie restriction and its impact on gut microbial**  
394 **composition and global metabolism.** *Front Med* 2018, **12**(6):634-644.
- 395 2. Schmedes MS, Yde CC, Svensson U, Håkansson J, Baby S, Bertram HC: **Impact**  
396 **of a 6-week very low-calorie diet and weight reduction on the serum and**  
397 **fecal metabolome of overweight subjects.** *European Food Research and*  
398 *Technology* 2015, **240**(3):583-594.
- 399 3. Redman LM, Huffman KM, Landerman LR, Pieper CF, Bain JR, Muehlbauer MJ,  
400 Stevens RD, Wenner BR, Kraus VB, Newgard CB *et al*: **Effect of caloric**  
401 **restriction with and without exercise on metabolic intermediates in nonobese**  
402 **men and women.** *J Clin Endocrinol Metab* 2011, **96**(2):E312-321.
- 403 4. Ravussin E, Redman LM, Rochon J, Das SK, Fontana L, Kraus WE, Romashkan  
404 S, Williamson DA, Meydani SN, Villareal DT *et al*: **A 2-Year Randomized**  
405 **Controlled Trial of Human Caloric Restriction: Feasibility and Effects on**  
406 **Predictors of Health Span and Longevity.** *J Gerontol A Biol Sci Med Sci* 2015,  
407 **70**(9):1097-1104.
- 408 5. Martin CK, Bhapkar M, Pittas AG, Pieper CF, Das SK, Williamson DA, Scott T,  
409 Redman LM, Stein R, Gilhooly CH *et al*: **Effect of Calorie Restriction on Mood,**  
410 **Quality of Life, Sleep, and Sexual Function in Healthy Nonobese Adults: The**  
411 **CALERIE 2 Randomized Clinical Trial.** *JAMA Intern Med* 2016, **176**(6):743-  
412 752.
- 413 6. Lefevre M, Redman LM, Heilbronn LK, Smith JV, Martin CK, Rood JC,  
414 Greenway FL, Williamson DA, Smith SR, Ravussin E *et al*: **Caloric restriction**  
415 **alone and with exercise improves CVD risk in healthy non-obese individuals.**  
416 *Atherosclerosis* 2009, **203**(1):206-213.
- 417 7. Santacruz A, Marcos A, Warnberg J, Marti A, Martin-Matillas M, Campoy C,  
418 Moreno LA, Veiga O, Redondo-Figuero C, Garagorri JM *et al*: **Interplay**  
419 **between weight loss and gut microbiota composition in overweight**  
420 **adolescents.** *Obesity (Silver Spring)* 2009, **17**(10):1906-1915.
- 421 8. Ott B, Skurk T, Hastreiter L, Lagkouvardos I, Fischer S, Buttner J, Kellerer T,  
422 Clavel T, Rychlik M, Haller D *et al*: **Effect of caloric restriction on gut**  
423 **permeability, inflammation markers, and fecal microbiota in obese women.**  
424 *Sci Rep* 2017, **7**(1):11955.
- 425 9. Hjorth MF, Blaedel T, Bendtsen LQ, Lorenzen JK, Holm JB, Kiilerich P, Roager  
426 HM, Kristiansen K, Larsen LH, Astrup A: **Prevotella-to-Bacteroides ratio**  
427 **predicts body weight and fat loss success on 24-week diets varying in**  
428 **macronutrient composition and dietary fiber: results from a post-hoc**  
429 **analysis.** *Int J Obes (Lond)* 2019, **43**(1):149-157.
- 430 10. Biolo G, Ciochi B, Stulle M, Bosutti A, Barazzoni R, Zanetti M, Antonione R,  
431 Lebenstedt M, Platen P, Heer M: **Calorie restriction accelerates the catabolism**  
432 **of lean body mass during 2 wk of bed rest.** *The American journal of clinical*  
433 *nutrition* 2007, **86**(2):366-372.

- 434 11. Turnbaugh PJ, Ley RE, Mahowald MA, Magrini V, Mardis ER, Gordon JI: **An**  
435 **obesity-associated gut microbiome with increased capacity for energy harvest.**  
436 *Nature* 2006, **444**(7122):1027-1031.
- 437 12. Kang C, Zhang Y, Zhu X, Liu K, Wang X, Chen M, Wang J, Chen H, Hui S,  
438 Huang L *et al*: **Healthy Subjects Differentially Respond to Dietary Capsaicin**  
439 **Correlating with Specific Gut Enterotypes.** *J Clin Endocrinol Metab* 2016,  
440 **101**(12):4681-4689.
- 441 13. Tolhurst G, Heffron H, Lam YS, Parker HE, Habib AM, Diakogiannaki E,  
442 Cameron J, Grosse J, Reimann F, Gribble FM: **Short-chain fatty acids stimulate**  
443 **glucagon-like peptide-1 secretion via the G-protein-coupled receptor FFAR2.**  
444 *Diabetes* 2012, **61**(2):364-371.
- 445 14. Arumugam M, Raes J, Pelletier E, Le Paslier D, Yamada T, Mende DR,  
446 Fernandes GR, Tap J, Bruls T, Batto JM *et al*: **Enterotypes of the human gut**  
447 **microbiome.** *Nature* 2011, **473**(7346):174-180.
- 448 15. Wu GD, Chen J, Hoffmann C, Bittinger K, Chen YY, Keilbaugh SA, Bewtra M,  
449 Knights D, Walters WA, Knight R *et al*: **Linking long-term dietary patterns**  
450 **with gut microbial enterotypes.** *Science* 2011, **334**(6052):105-108.
- 451 16. Vandeputte D, Falony G, Vieira-Silva S, Tito RY, Joossens M, Raes J: **Stool**  
452 **consistency is strongly associated with gut microbiota richness and**  
453 **composition, enterotypes and bacterial growth rates.** *Gut* 2016, **65**(1):57-62.
- 454 17. Hjorth MF, Roager HM, Larsen TM, Poulsen SK, Licht TR, Bahl MI, Zohar Y,  
455 Astrup A: **Pre-treatment microbial Prevotella-to-Bacteroides ratio,**  
456 **determines body fat loss success during a 6-month randomized controlled**  
457 **diet intervention.** *Int J Obes (Lond)* 2018, **42**(3):580-583.
- 458 18. Koeth RA, Wang Z, Levison BS, Buffa JA, Org E, Sheehy BT, Britt EB, Fu X,  
459 Wu Y, Li L *et al*: **Intestinal microbiota metabolism of L-carnitine, a nutrient**  
460 **in red meat, promotes atherosclerosis.** *Nat Med* 2013, **19**(5):576-585.
- 461 19. Zeevi D, Korem T, Zmora N, Israeli D, Rothschild D, Weinberger A, Ben-Yacov  
462 O, Lador D, Avnit-Sagi T, Lotan-Pompan M *et al*: **Personalized Nutrition by**  
463 **Prediction of Glycemic Responses.** *Cell* 2015, **163**(5):1079-1094.
- 464 20. Korem T, Zeevi D, Zmora N, Weissbrod O, Bar N, Lotan-Pompan M, Avnit-Sagi  
465 T, Kosower N, Malka G, Rein M *et al*: **Bread Affects Clinical Parameters and**  
466 **Induces Gut Microbiome-Associated Personal Glycemic Responses.** *Cell*  
467 *Metab* 2017, **25**(6):1243-1253 e1245.
- 468 21. Potts M: **China's one child policy.** *BMJ* 2006, **333**(7564):361-362.
- 469 22. Wang SS, Lay S, Yu HN, Shen SR: **Dietary Guidelines for Chinese Residents**  
470 **(2016): comments and comparisons.** *J Zhejiang Univ Sci B* 2016, **17**(9):649-656.
- 471 23. Wan Y, Wang F, Yuan J, Li D: **Optimal dietary macronutrient distribution in**  
472 **China (ODMDC): a randomised controlled-feeding trial protocol.** *Asia Pac J*  
473 *Clin Nutr* 2017, **26**(5):972-980.
- 474 24. Qin J, Li Y, Cai Z, Li S, Zhu J, Zhang F, Liang S, Zhang W, Guan Y, Shen D *et*  
475 *al*: **A metagenome-wide association study of gut microbiota in type 2 diabetes.**  
476 *Nature* 2012, **490**(7418):55-60.
- 477 25. Fang C, Zhong H, Lin Y, Chen B, Han M, Ren H, Lu H, Luber JM, Xia M, Li W  
478 *et al*: **Assessment of the cPAS-based BGISEQ-500 platform for metagenomic**  
479 **sequencing.** *Gigascience* 2018, **7**(3):1-8.



- 480 26. Li J, Jia H, Cai X, Zhong H, Feng Q, Sunagawa S, Arumugam M, Kultima JR,  
481 Prifti E, Nielsen T *et al*: **An integrated catalog of reference genes in the human**  
482 **gut microbiome**. *Nat Biotechnol* 2014, **32**(8):834-841.
- 483 27. Costea PI, Hildebrand F, Arumugam M, Bäckhed F, Blaser MJ, Bushman FD,  
484 de Vos WM, Ehrlich SD, Fraser CM, Hattori M *et al*: **Enterotypes in the**  
485 **landscape of gut microbial community composition**. *Nature Microbiology*  
486 2017, **3**(1):8-16.
- 487 28. Patil KR, Nielsen J: **Uncovering transcriptional regulation of metabolism by**  
488 **using metabolic network topology**. *Proceedings of the National Academy of*  
489 *Sciences of the United States of America* 2005, **102**(8):2685-2689.
- 490 29. Kanehisa M, Goto S: **KEGG: kyoto encyclopedia of genes and genomes**.  
491 *Nucleic acids research* 2000, **28**(1):27-30.
- 492 30. Jie Z, Liang S, Ding Q, Tang S, Li F, Wang D, Lin Y, Chen P, Cai K, Rao W *et al*:  
493 **A multi-omic cohort as a reference point for promoting a healthy human gut**  
494 **microbiome**. *bioRxiv* 2019:585893.
- 495 31. Tibshirani R: **Regression shrinkage and selection via the lasso: a retrospective**.  
496 *Journal of the Royal Statistical Society: Series B (Statistical Methodology)* 2011,  
497 **73**(3):273-282.
- 498 32. Lim MY, Rho M, Song YM, Lee K, Sung J, Ko G: **Stability of gut enterotypes**  
499 **in Korean monozygotic twins and their association with biomarkers and diet**.  
500 *Sci Rep* 2014, **4**:7348.
- 501 33. Woting A, Pfeiffer N, Loh G, Klaus S, Blaut M: **Clostridium ramosum**  
502 **promotes high-fat diet-induced obesity in gnotobiotic mouse models**. *MBio*  
503 2014, **5**(5):e01530-01514.
- 504 34. Le Chatelier E, Nielsen T, Qin J, Prifti E, Hildebrand F, Falony G, Almeida M,  
505 Arumugam M, Batto JM, Kennedy S *et al*: **Richness of human gut microbiome**  
506 **correlates with metabolic markers**. *Nature* 2013, **500**(7464):541-546.
- 507 35. Karlsson FH, Tremaroli V, Nookaew I, Bergstrom G, Behre CJ, Fagerberg B,  
508 Nielsen J, Backhed F: **Gut metagenome in European women with normal,**  
509 **impaired and diabetic glucose control**. *Nature* 2013, **498**(7452):99-103.
- 510 36. Brahe LK, Le Chatelier E, Prifti E, Pons N, Kennedy S, Hansen T, Pedersen O,  
511 Astrup A, Ehrlich SD, Larsen LH: **Specific gut microbiota features and**  
512 **metabolic markers in postmenopausal women with obesity**. *Nutr Diabetes*  
513 2015, **5**:e159.
- 514 37. Ballard F, Tomas F: **3-Methylhistidine as a measure of skeletal muscle protein**  
515 **breakdown in human subjects: the case for its continued use**. *Clinical science*  
516 1983, **65**(3):209-215.
- 517 38. Tipton KD, Hamilton DL, Gallagher IJ: **Assessing the Role of Muscle Protein**  
518 **Breakdown in Response to Nutrition and Exercise in Humans**. *Sports Med*  
519 2018, **48**(Suppl 1):53-64.
- 520 39. Wolfe RR: **The underappreciated role of muscle in health and disease**. *The*  
521 *American journal of clinical nutrition* 2006, **84**(3):475-482.
- 522 40. Deibert P, Konig D, Schmidt-Trucksäss A, Zaenker KS, Frey I, Landmann U,  
523 Berg A: **Weight loss without losing muscle mass in pre-obese and obese**  
524 **subjects induced by a high-soy-protein diet**. *Int J Obes Relat Metab Disord*  
525 2004, **28**(10):1349-1352.

526

527

## 528 **Figures, tables and supplemental materials**

529 **Figure 1. Overview of the experimental design.** Illustration of our experimental design,  
530 including a 1-week run-in period (baseline) and a 3-week calorie restriction (CR) dietary  
531 intervention trial with 50% energy deficit diet (male, ~1200Kcal/day; female,  
532 ~1000Kcal/day). BMI, fasting blood samples and fecal samples of 41 enrolled healthy  
533 subjects were collected before and after the CR intervention to assess its effects on BMI,  
534 blood amino acids and gut microbiome in two enterotype groups.

535 **Figure 2. A short-term CR intervention altered BMI.** (A) Principal coordinates  
536 analysis (PCoA) based on genera-level Bray-Curtis distance between all baseline fecal  
537 samples. Orange, subjects of enterotype *Bacteroides* (ETB) and blue, subjects of  
538 enterotype *Prevotella* (ETP). (B) Baseline BMI between ETB and ETP subjects. (C)  
539 Changes in BMI before and after intervention in individuals of each enterotype. (D)  
540 Boxplot showing BMI loss ratio between ETB subjects and ETP subjects. \*,  $P < 0.05$ ; \*\*,  
541  $P < 0.01$ .

542 **Figure 3. Overall gut microbial composition of two enterotypes before and after the**  
543 **CR.** (A) Species-based principal coordinates analysis (PCoA) of subjects before and after  
544 the CR trial. Triangles, samples of ETB; Circles, samples of ETP. Arrows indicate paired  
545 samples from the same individual. Boxplot showing the projected coordinate 1 (PCo1)  
546 and PCo2 of samples before and after the intervention. (B-C)  $\alpha$ -diversity (Shannon index)  
547 at the gene and species levels before (blue) and after (red) intervention in each enterotype  
548 group. (D-E)  $\beta$ -diversity (Bray-Curtis distance) at the gene and species levels before  
549 (blue) and after (red) the intervention in each enterotype group. -ns, no significance,  $P >$   
550 0.05, Wilcoxon signed-rank test.

551 **Figure 4. A short-term CR intervention altered blood amino acids.** (A) Principal  
552 component analysis (PCA) of 41 subjects using baseline blood amino acid profiles.  
553 Orange, ETB; blue, ETP. (B) Comparison of baseline blood amino acid concentrations  
554 between ETB subjects (orange) and ETP subjects (blue). Wilcoxon rank-sum test,  $P$   
555 values are transformed to Z-scores to represent enrichment directions. (C) Amino acid  
556 based PCA of samples before and after the intervention. Triangles, samples of ETB

557 subjects; Circles, samples of ETP subjects. Arrows indicate paired samples from the same  
558 individual. **(D)** Changes in blood amino acid concentrations of ETB subjects, ETP  
559 subjects and all subjects before and after the intervention. Wilcoxon rank-sum test, P  
560 values are transformed to Z-scores to represent enrichment directions. Dashed line  
561 indicates the absolute Z score of 1.96 ( $P = 0.05$ ). Asterisk (\*) indicates significance of  
562 Benjamini-Hochberg (BH) adjusted  $P < 0.05$ .

563 **Figure 5. Prediction of BMI loss ratio using baseline abundances of gut microbial**  
564 **species.** **(A)** Bar plot showing the 7 gut microbial species selected by least absolute  
565 shrinkage and selection operator (Lasso). Bar length indicates regression coefficient of  
566 each species estimated by Lasso. Orange, species significantly enriched in ETB subjects  
567 (BH-adjusted  $P < 0.05$ ); blue, species slightly enriched in ETP subjects ( $P < 0.05$  and  
568 BH-adjusted  $P = 0.06$ ); grey, species with no significant enrichment between two  
569 enterotypes ( $P > 0.05$ ).

570 **(B)** Scatter plot showing prediction performance of BMI loss ratio based on the 7 selected  
571 species. Leave-one-out cross validation (LOOCV) was applied to evaluate the  
572 performance of generalized linear model (GLM), showing a strong Spearman's rho  
573 between actual BMI loss ratios and predicted BMI loss ratios of 0.646. Red circles, ETB  
574 individuals; blue circles, ETP individuals.

575 **Supplemental Figure 1. Baseline gut microbial differences between two enterotype**  
576 **groups.** **(A)** Differentially enriched species between two enterotype groups. Orange and  
577 blue represent species overrepresented in ETB and ETP subjects, respectively. **(B)**  
578 Differential enrichment of KEGG pathways between ETB and ETP subjects. Dashed  
579 lines indicate a reporter score of 1.96, corresponding to 95% confidence in a normal  
580 distribution. Orange and blue bars indicate reporter scores of selected KEGG pathway  
581 overrepresented in ETB and ETP subjects, respectively.

582 **Supplemental Figure 2. Performance of baseline BMI for prediction of BMI loss**  
583 **ratio.**

584 Scatter plot showing prediction performance of BMI loss ratio using baseline BMI values.  
585 A Spearman's rho between actual BMI loss ratios and predicted BMI loss ratios was -  
586 0.016. Red circles, ETB individuals; blue circles, ETP individuals.

587

588 **Table 1.** Cohort description

589 **Table 2.** Comparison of baseline phenotypes between ETB and ETP subjects

590 **Supplemental Table 1.** Statistics for metagenomic sequencing data of fecal samples

591 **Supplemental Table 2.** Enterotype classification of individual fecal samples before and  
592 after the intervention

593 **Supplemental Table 3.** List of common genera

594 **Supplemental Table 4.** List of common species

595 **Supplemental Table 5.** Comparison of baseline genera relative abundance between ETB  
596 and ETP subjects

597 **Supplemental Table 6.** Comparison of baseline species relative abundance between ETB  
598 and ETP subjects

599 **Supplemental Table 7.** Differential enrichment of KEGG pathway between ETB and  
600 ETP subjects at baseline

601 **Supplemental Table 8.** Comparison of species relative abundance before and after the  
602 intervention in each enterotype

603 **Supplemental Table 9.** Differential enrichment of KEGG pathway before and after the  
604 intervention in each enterotype

605 **Supplemental Table 10.** Comparison of baseline blood amino acid levels between ETB  
606 and ETP subjects

607 **Supplemental Table 11.** Comparison of blood amino acid levels before and after the  
608 intervention

609 **Supplemental Table 12.** Comparison of blood amino acid levels between ETB and ETP  
610 subjects after the intervention

611

**Table 1. Cohort Description**

|                               | <b>Cohort<br/>(Mean <math>\pm</math> SD)</b> |
|-------------------------------|----------------------------------------------|
| <b>Number of subjects</b>     | 41                                           |
| <b>Sex (female/male)</b>      | 24/17                                        |
| <b>Age</b>                    | 30 $\pm$ 6                                   |
| <b>BMI (kg/m<sup>2</sup>)</b> | 23.72 $\pm$ 2.81                             |
| <b>Weight(kg)</b>             | 64.84 $\pm$ 11.57                            |

**Table 2. Comparison of baseline phenotypes of ETB and ETP subjects**

|                               | <b>ETB Group<br/>(Mean <math>\pm</math> SD)</b> | <b>ETP Group<br/>(Mean <math>\pm</math> SD)</b> | <b>P value<br/>ETB vs ETP</b> |
|-------------------------------|-------------------------------------------------|-------------------------------------------------|-------------------------------|
| <b>Number of subjects</b>     | 28                                              | 13                                              |                               |
| <b>Sex (female/male)</b>      | 16/12                                           | 8/5                                             | 1                             |
| <b>Age</b>                    | 29 $\pm$ 6                                      | 30 $\pm$ 7                                      | 0.44                          |
| <b>BMI (kg/m<sup>2</sup>)</b> | 23.50 $\pm$ 2.81                                | 24.21 $\pm$ 2.85                                | 0.42                          |
| <b>Weight (kg)</b>            | 64.40 $\pm$ 11.37                               | 65.81 $\pm$ 12.39                               | 0.62                          |

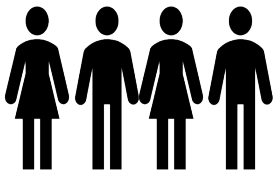

Volunteer recruitment

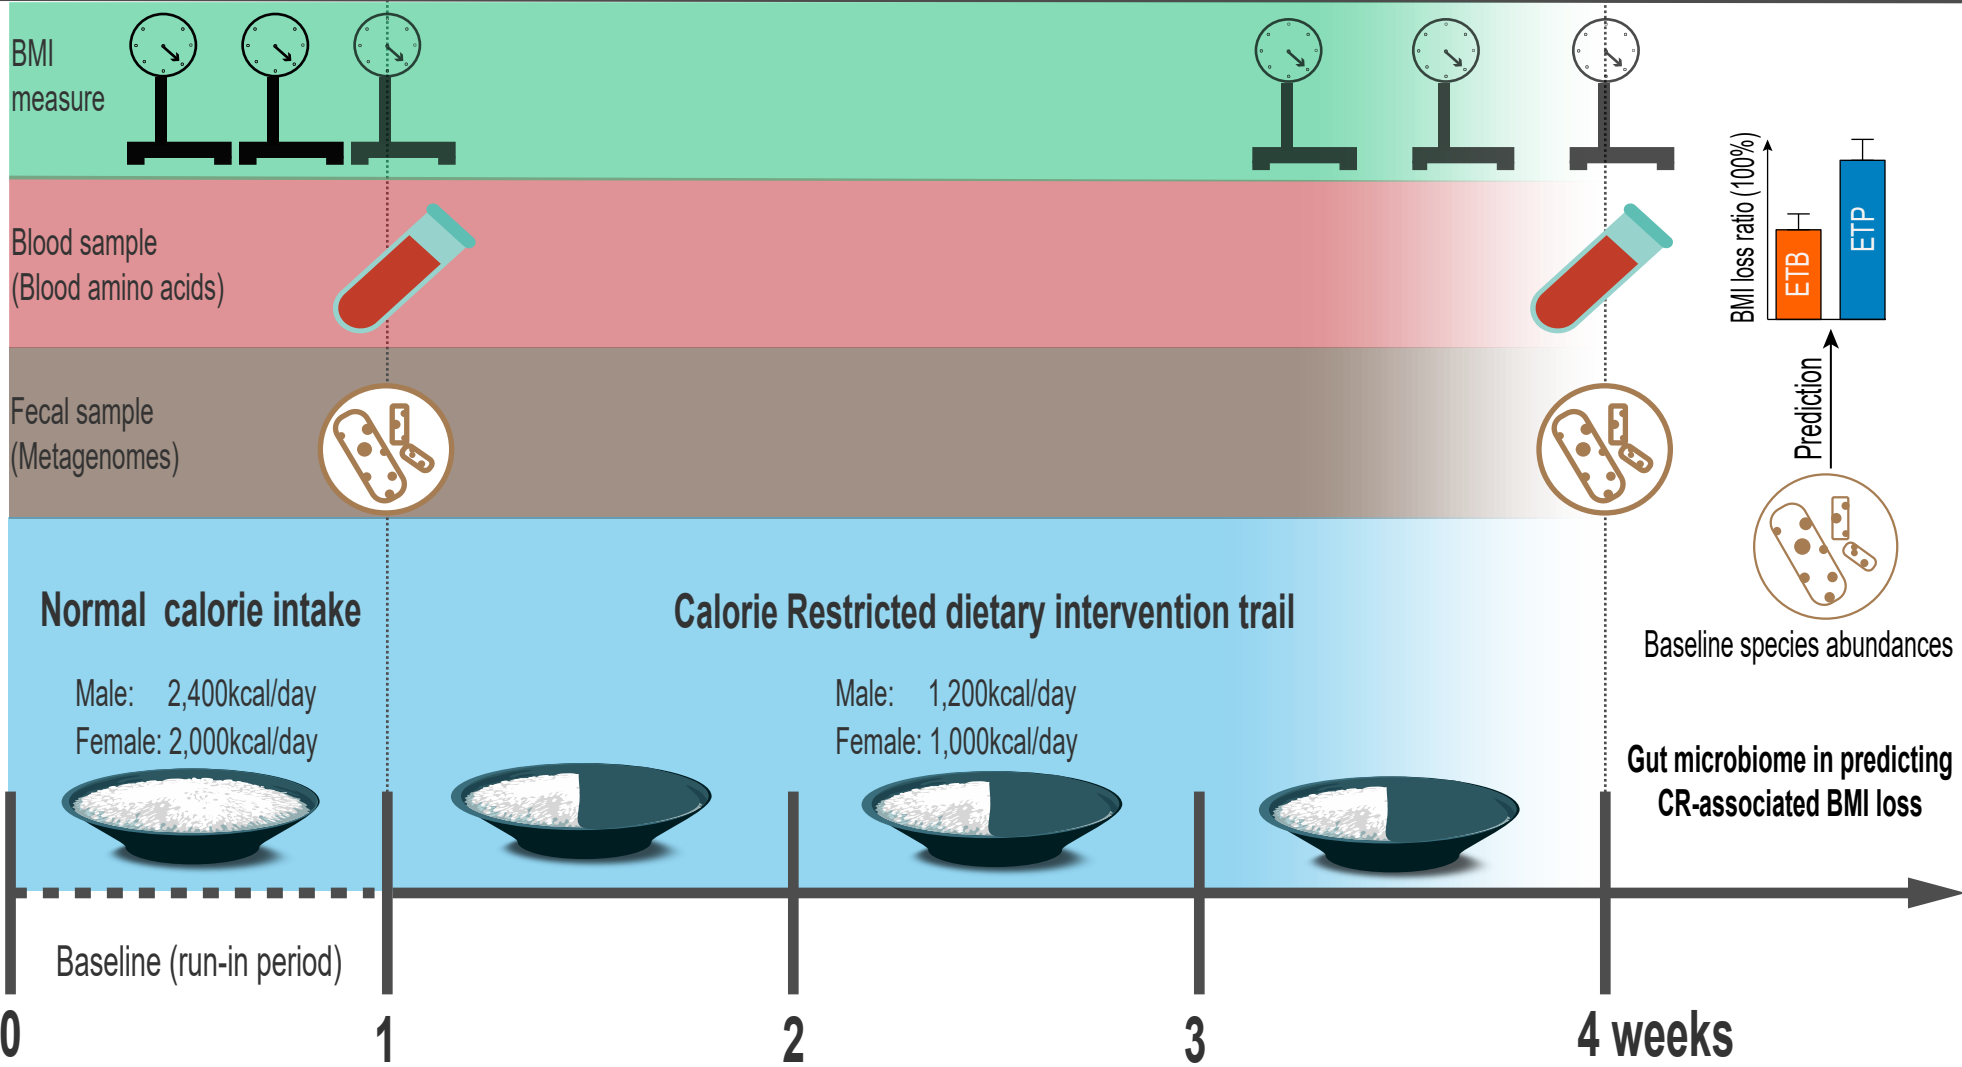



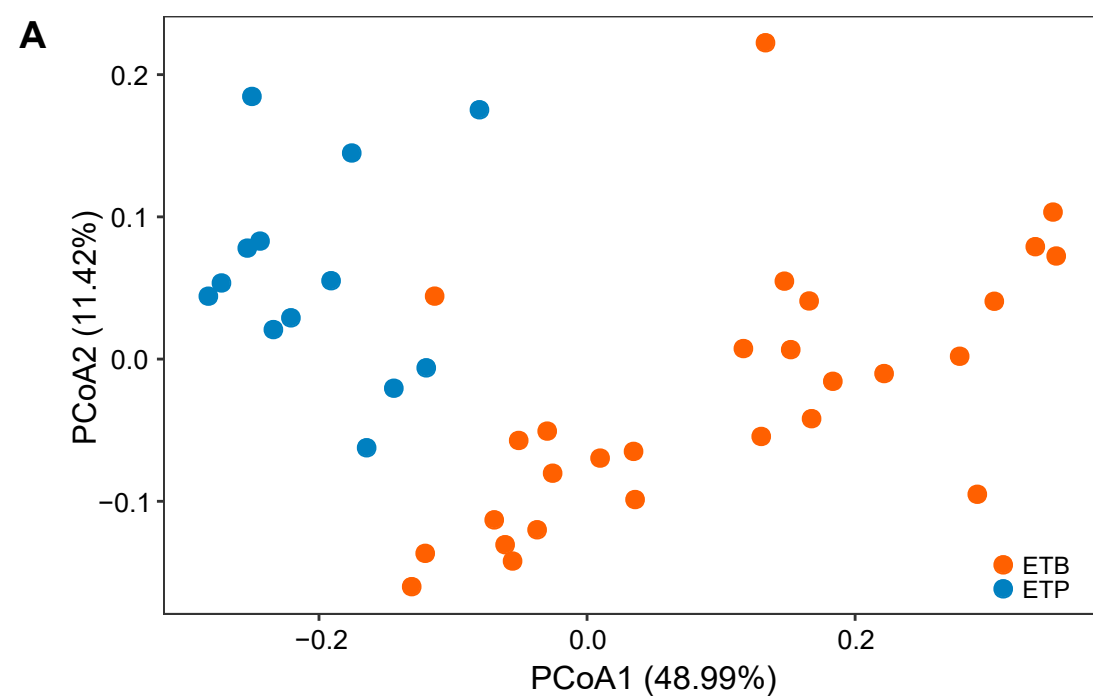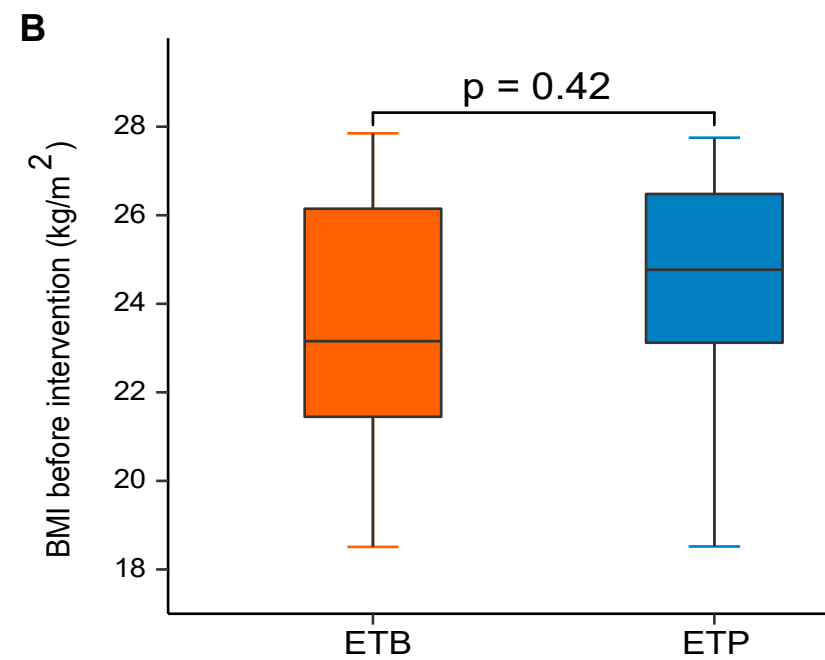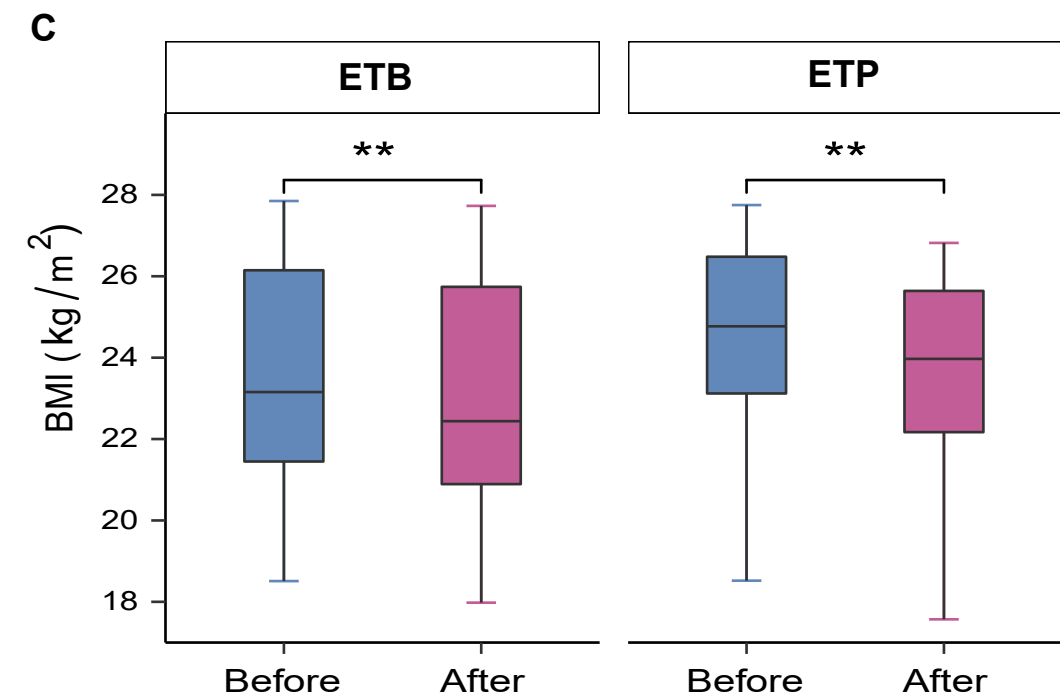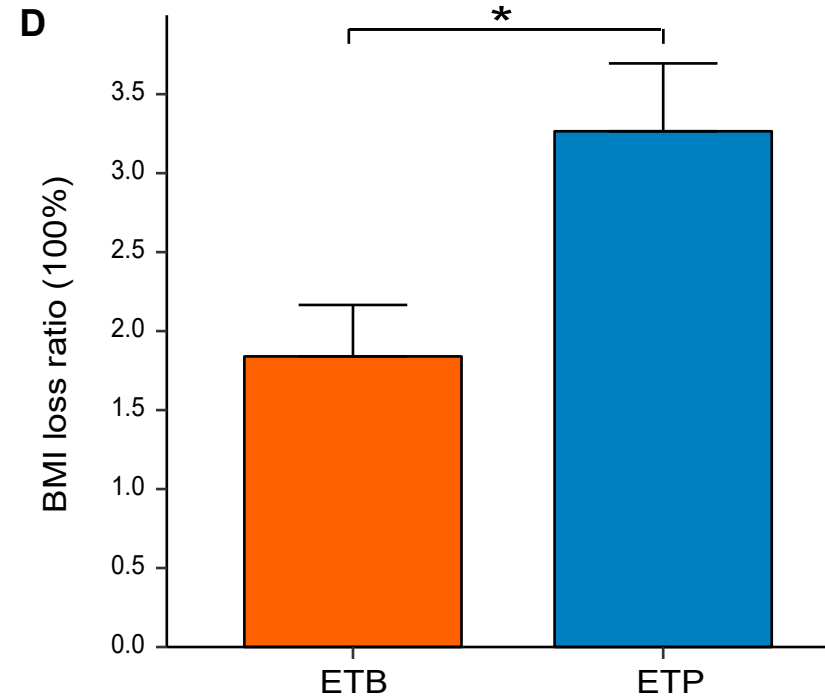

**A**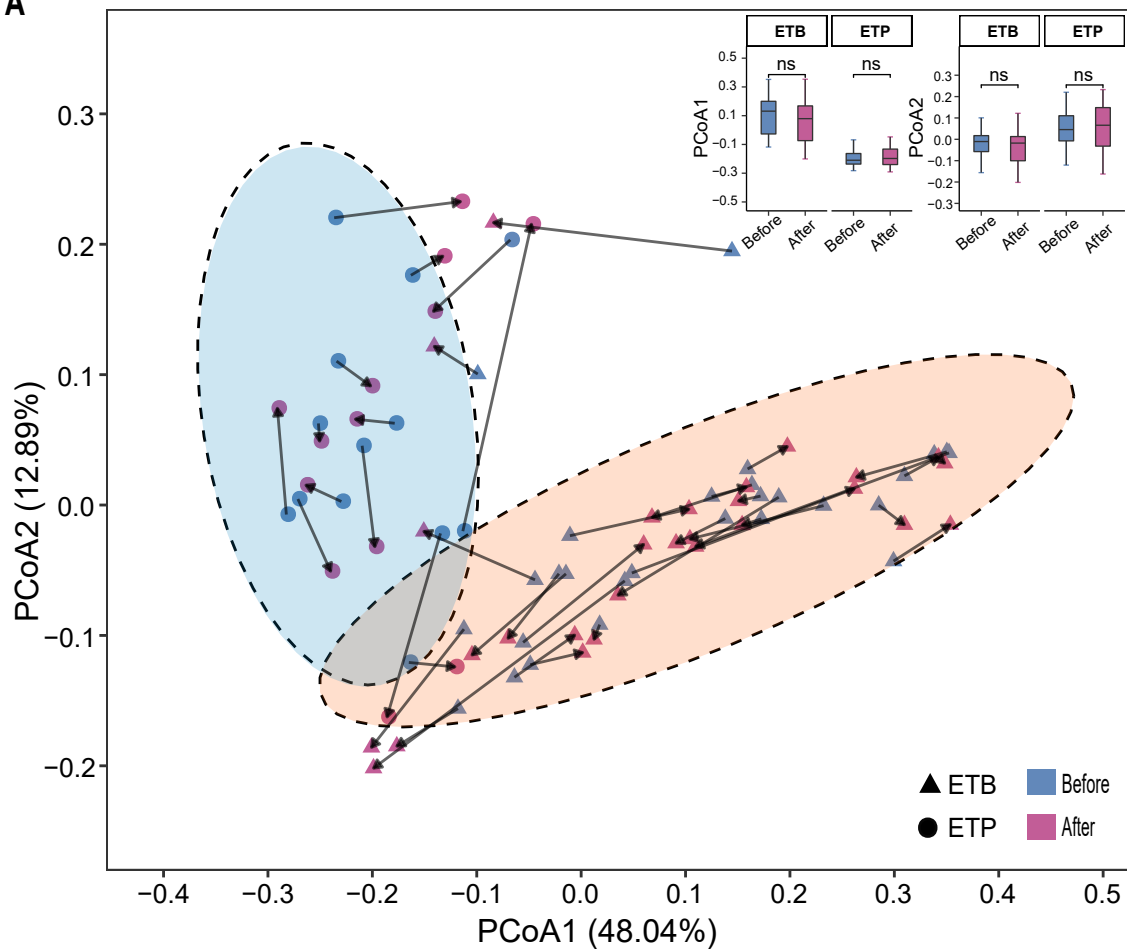**B**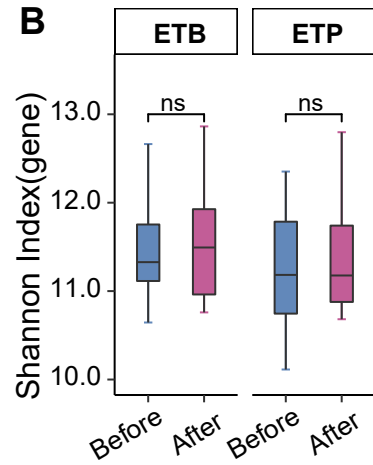**C**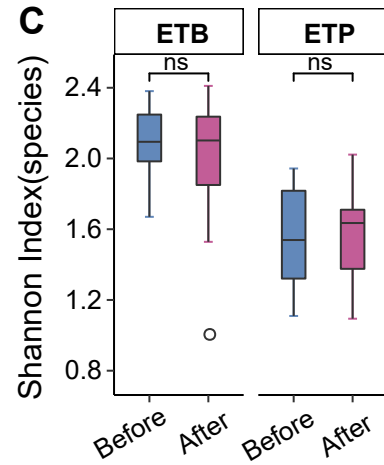**D**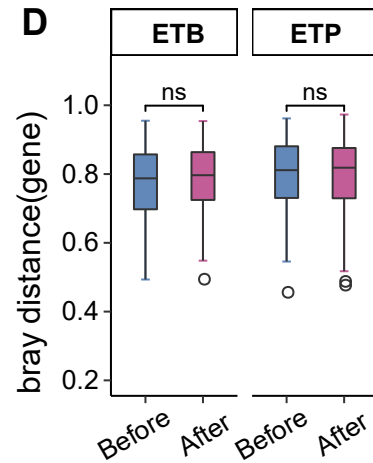**E**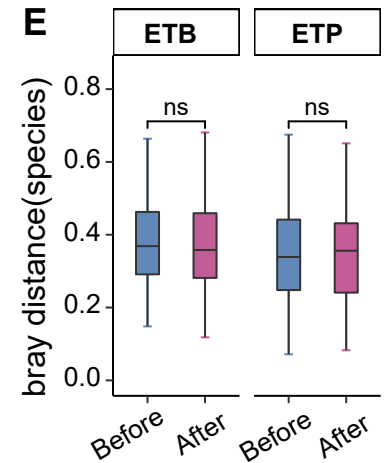

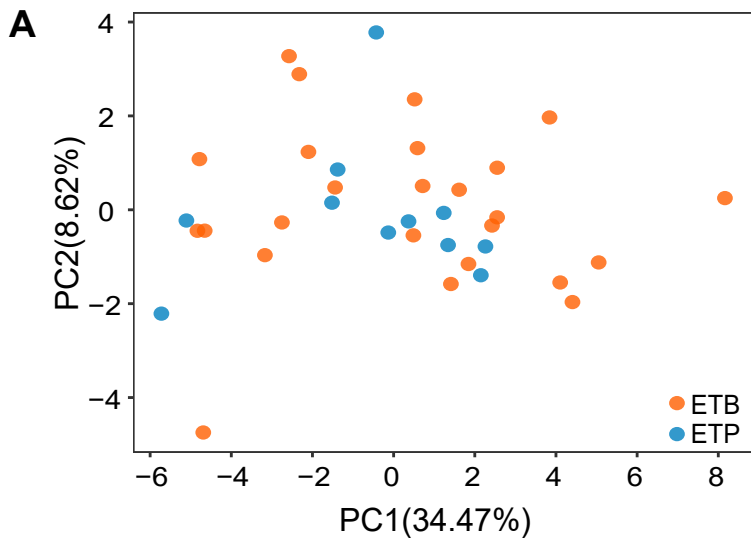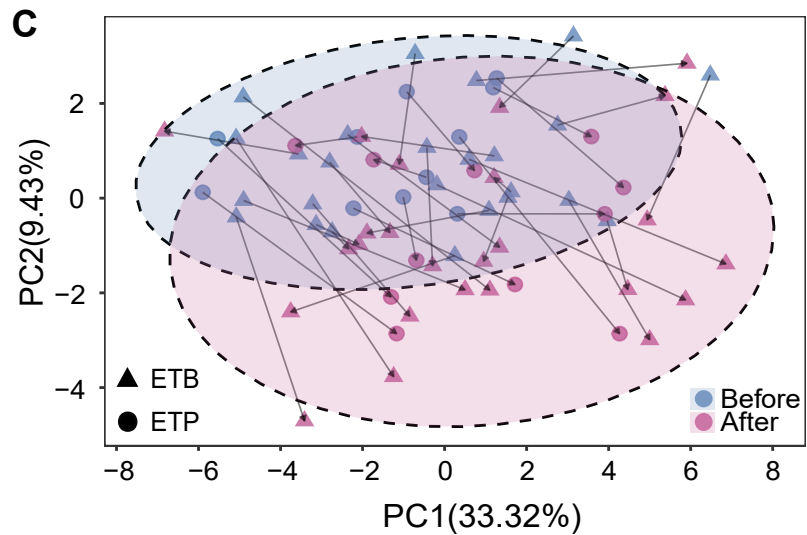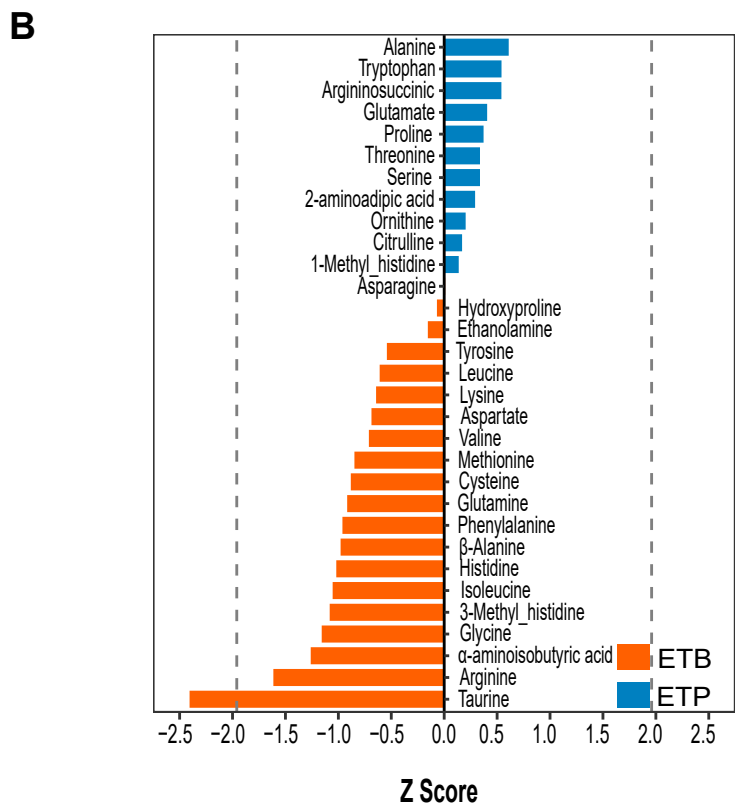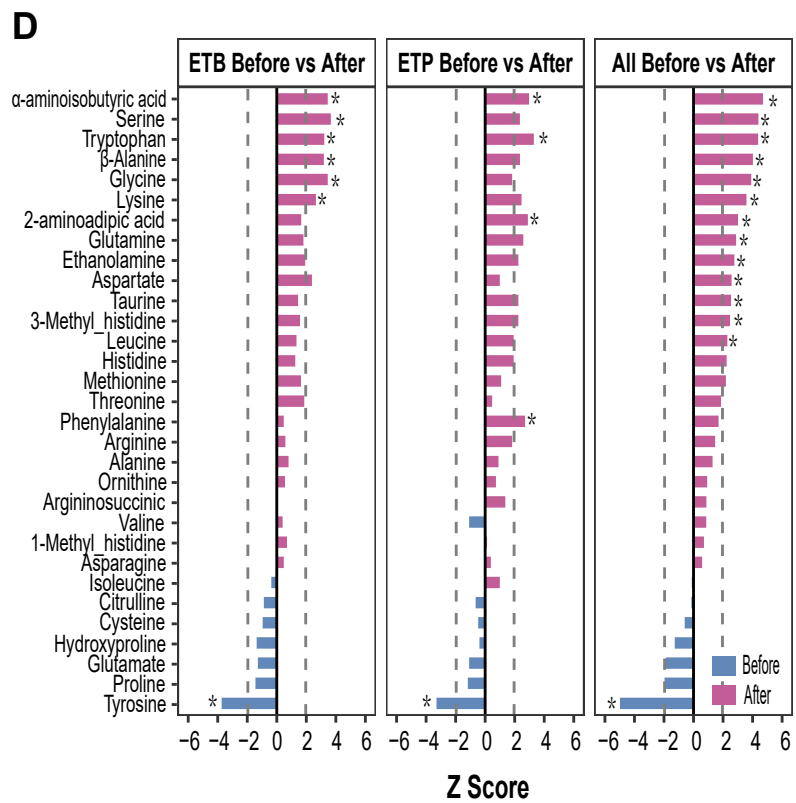

**A**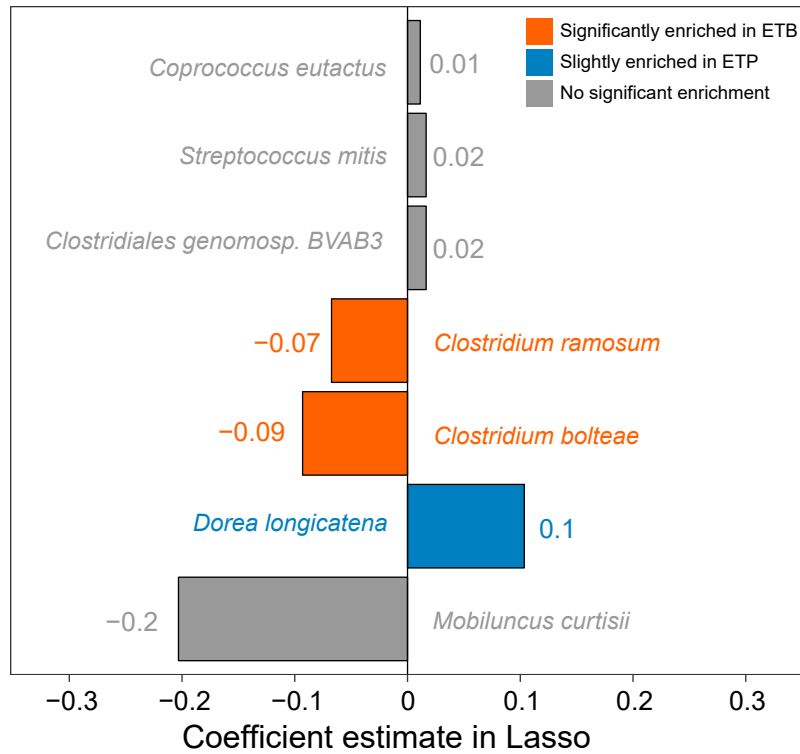**B**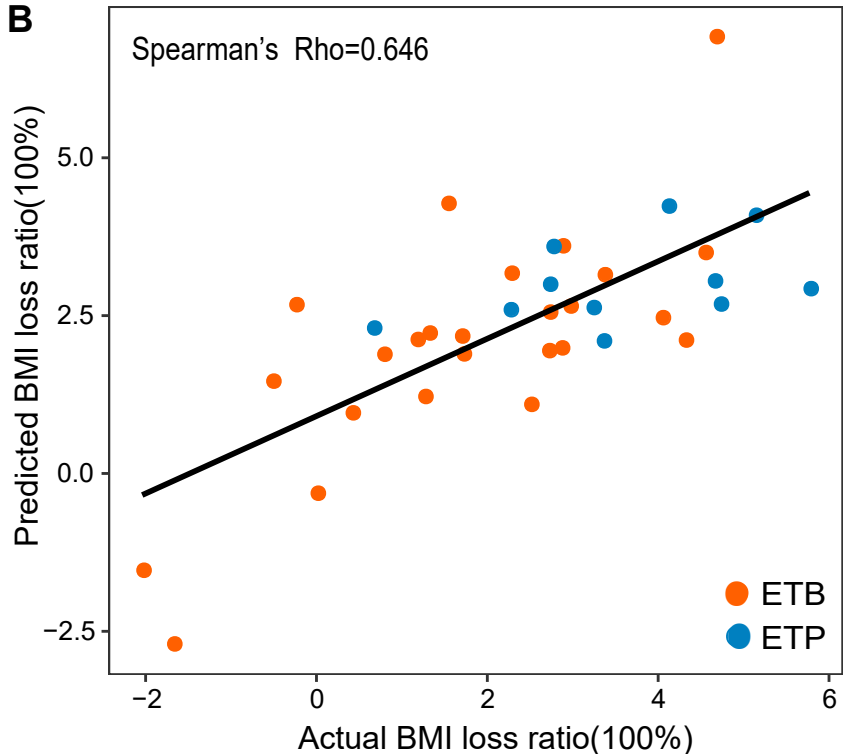

A

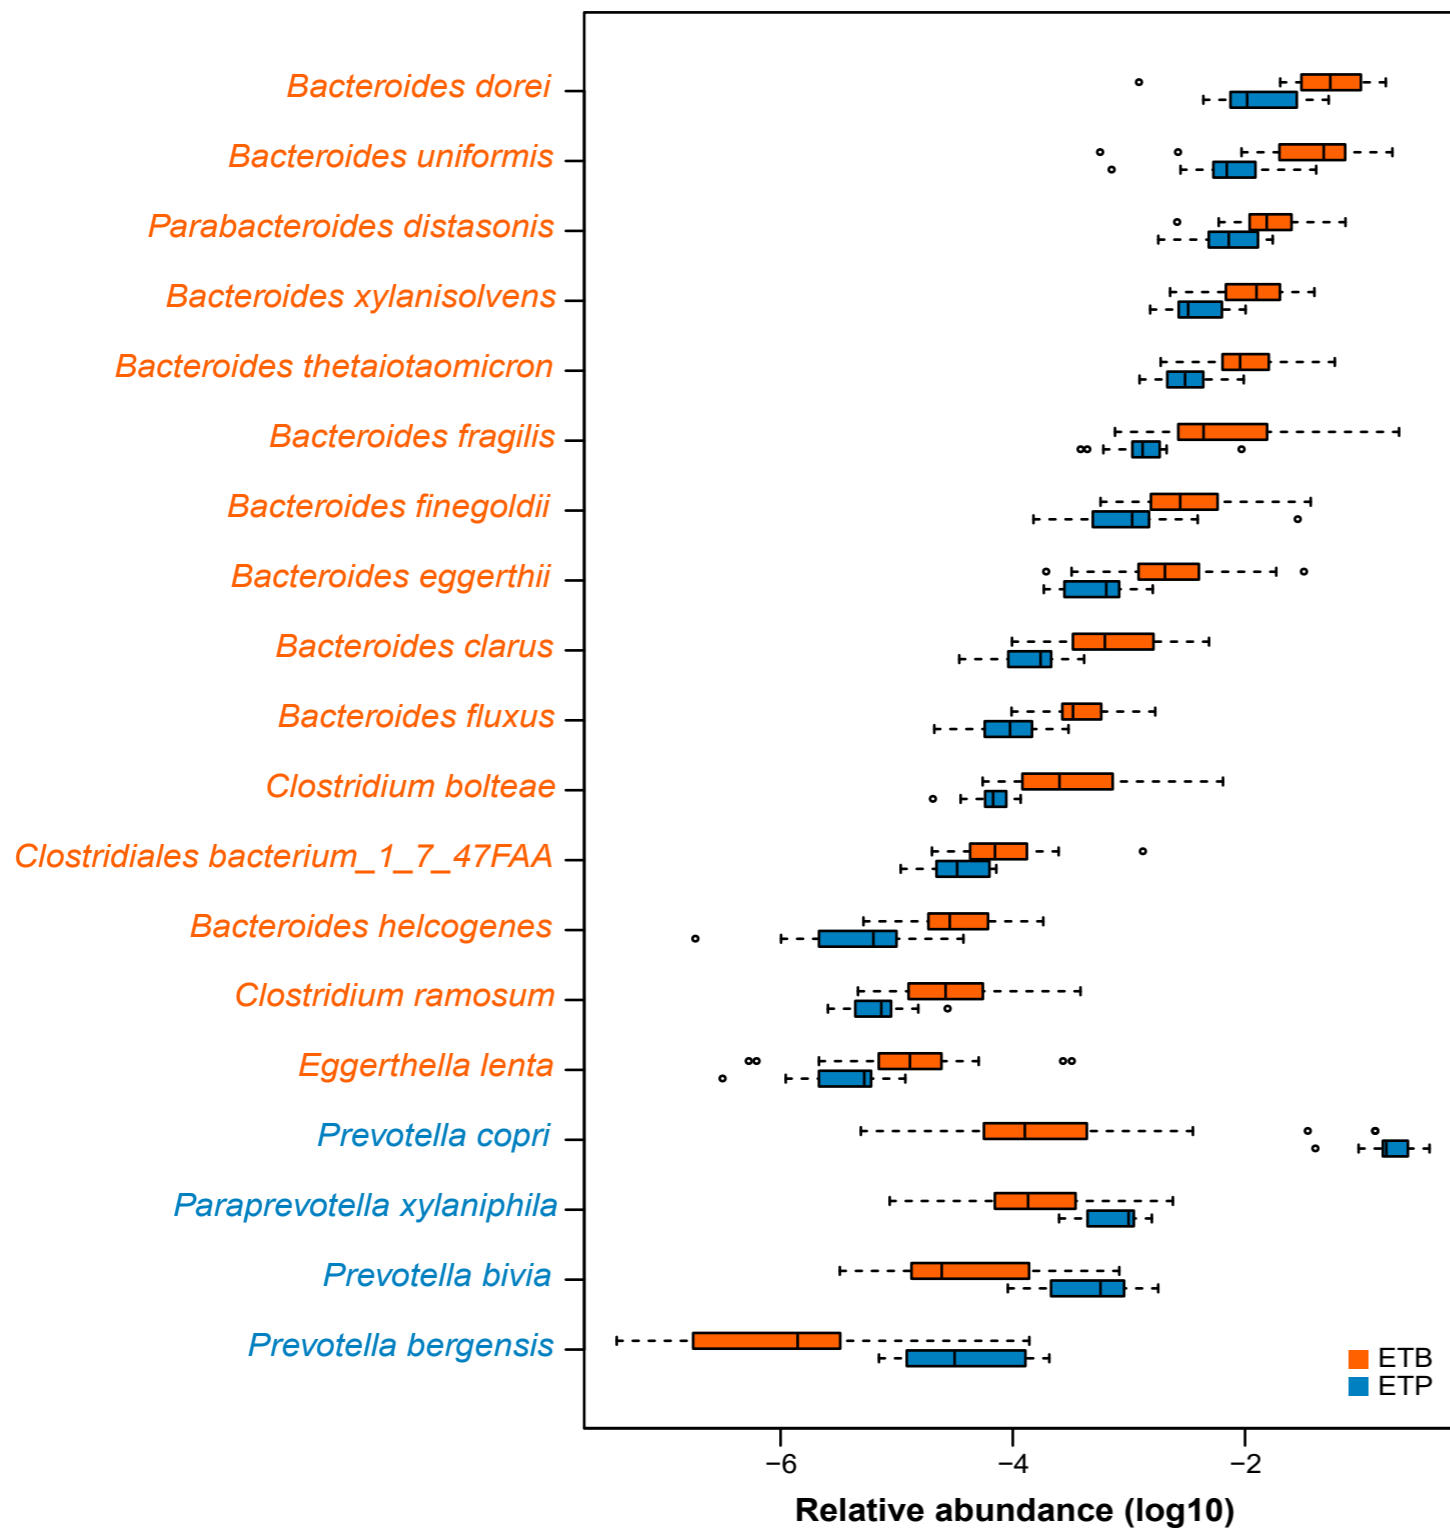

B

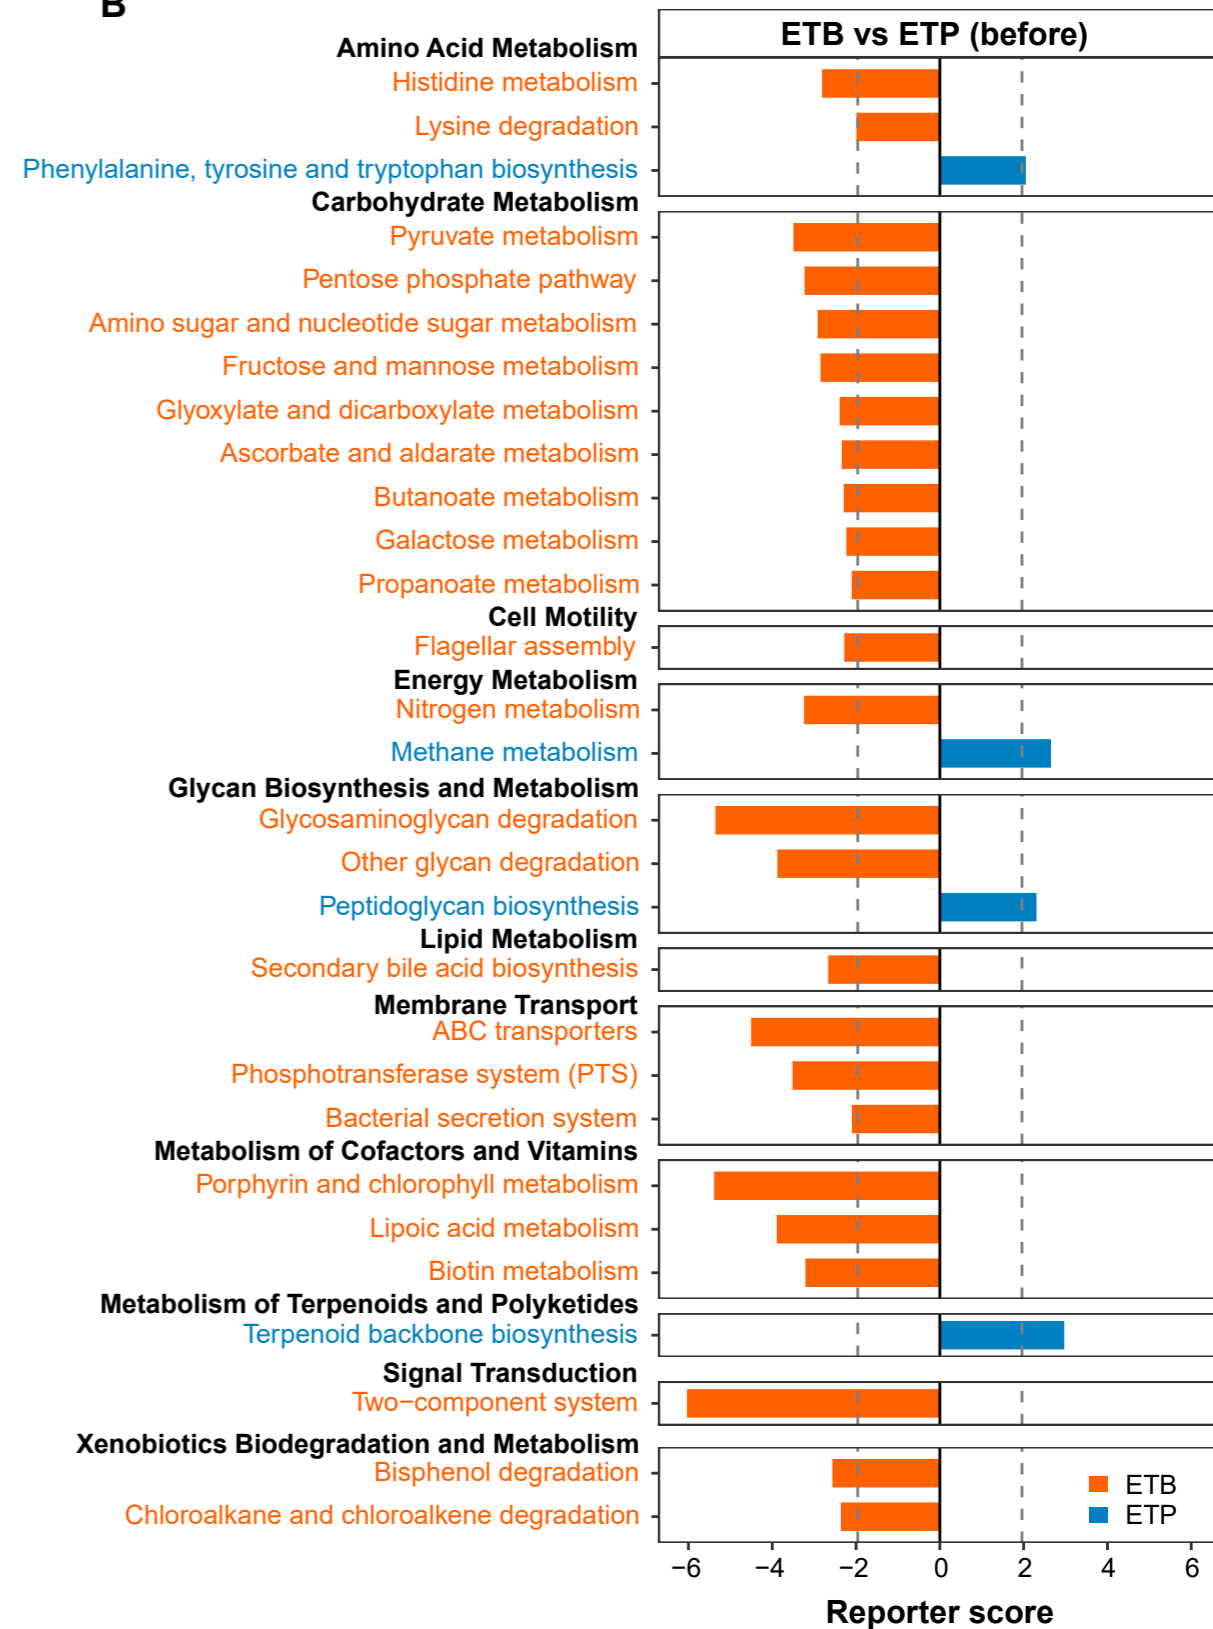

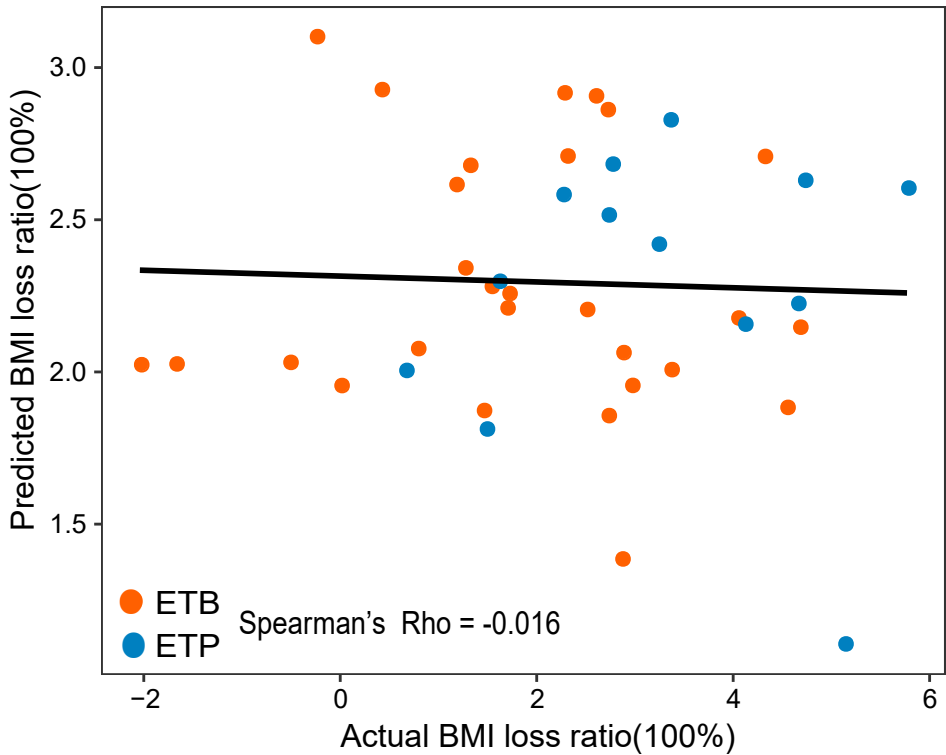

Source: https://www.biorxiv.org/content/10.1101/514596v3.full.pdf
